# Supplementary material for: De novo transcriptome sequencing and analysis of Coccinella septempunctata L. in non-diapause, diapause and diapause-terminated states to identify diapause-associated genes
Source: PubMed Central journal article supplement (PMC4687109; doi:10.1186/s12864-015-2309-3), 2015-12-21

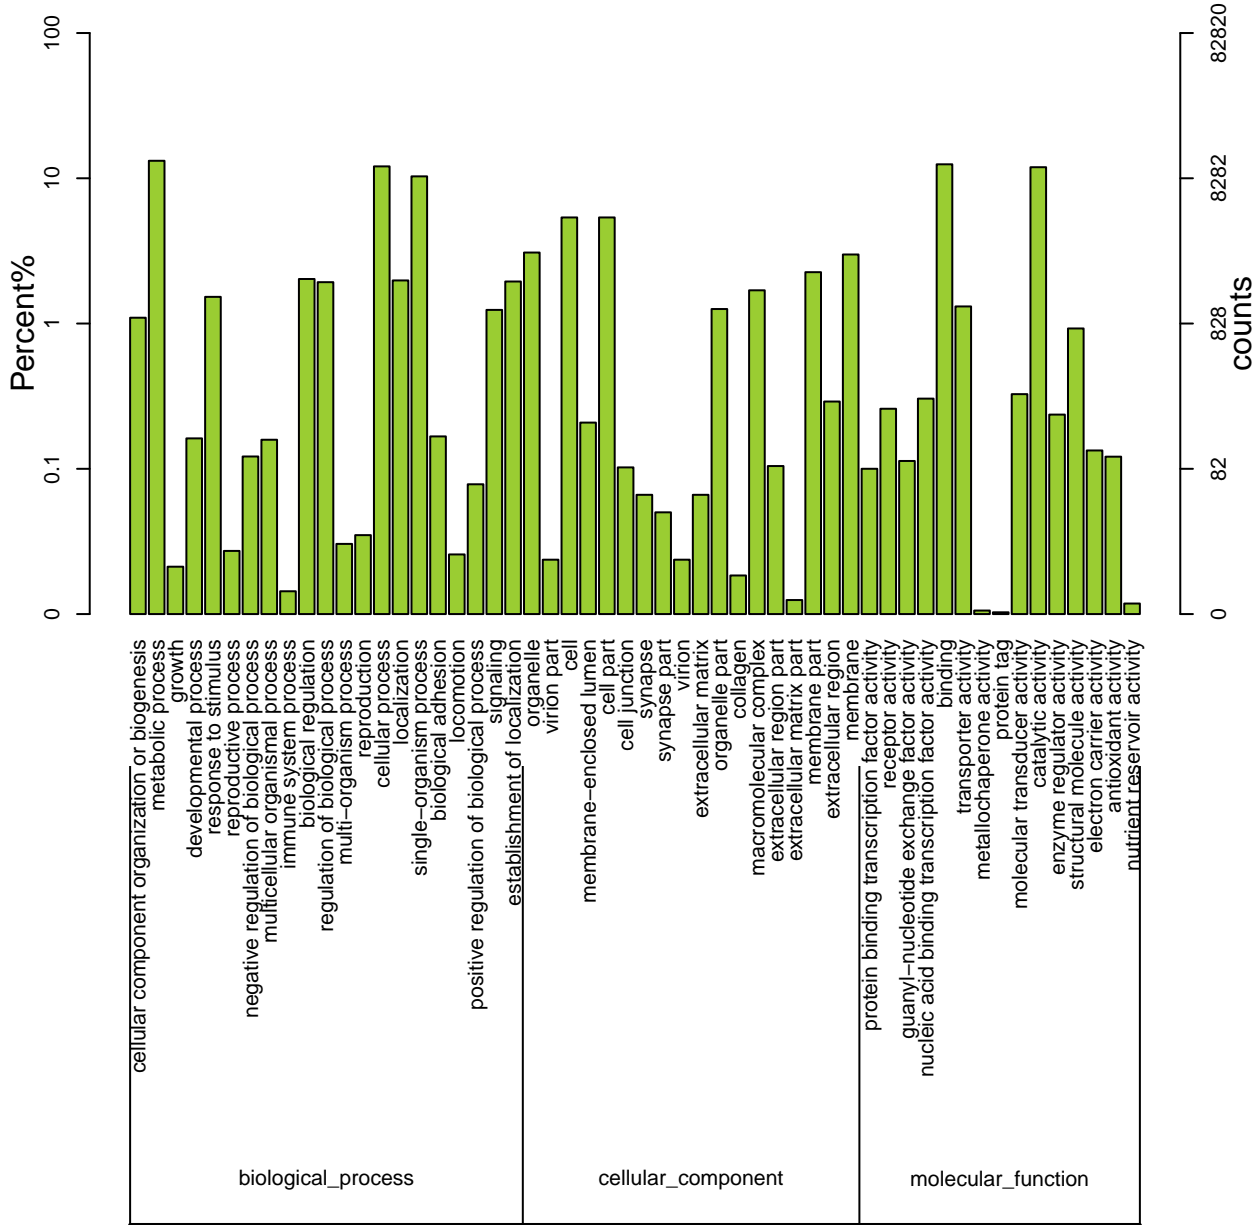

Supplement: 12864_2015_2309_MOESM2_ESM.pdf [file 12864_2015_2309_MOESM2_ESM.pdf]
